# Supplementary material for: The impact of Spodoptera exigua herbivory on Meloidogyne incognita-induced root responses depends on the nematodes’ life cycle stages
Source: PubMed Central journal article supplement (PMC7336558; doi:10.1093/aobpla/plaa029), 2020-06-24
Supplement: plaa029_suppl_supporting_information.pdf [file plaa029_suppl_supporting_information.pdf]

**The impact of *Spodoptera exigua* herbivory on *Meloidogyne incognita* induced root responses depends on the nematodes' life cycle stages**

**Crispus M. Mbaluto<sup>1,4</sup>, Esraa M. Ahmad<sup>2</sup>, Melody Fu<sup>3</sup>, Ainhoa Martínez-Medina<sup>1,5</sup>, Nicole M. van Dam<sup>1,4\*</sup>**

**Supporting Information**

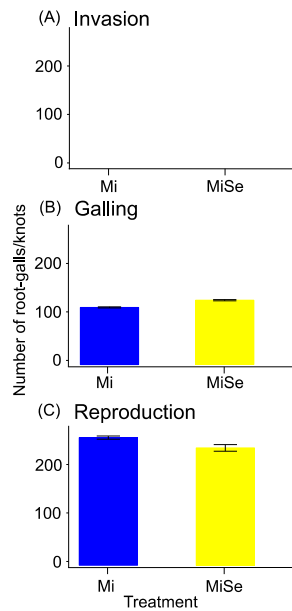

**Figure S1** the number of root galls counted in tomato plants roots upon root infection by *Meloidogyne incognita*. Average number of root galls counted in tomato roots infected with *Meloidogyne incognita* (Mi) or co-infected with both shoot herbivore *Spodoptera exigua* (Se) and *M. incognita* (MiSe). Roots were harvested at the nematodes' invasion (A), galling (B), and reproduction (C) stages. Data are the mean  $\pm$  standard error ( $n=10$ ).

**Table S1 List of primers sequences used for qPCR**

| Target gene                                                                                        | Hormone pathway                                                                      | Primer orientation | Primer sequences (5'-3') |
|----------------------------------------------------------------------------------------------------|--------------------------------------------------------------------------------------|--------------------|--------------------------|
| <i>Lipoxygenase D (LoxD)</i> <sup>a</sup>                                                          | Jasmonic acid (JA)                                                                   | Forward            | GGCTTTATTTACACAGAGATA    |
|                                                                                                    |                                                                                      | Reverse            | ATGTGCTGCCAATATAAATGGTTC |
| <i>Leucine aminopeptidase (LapA)</i> <sup>b</sup>                                                  |                                                                                      | Forward            | ATCTCAGGTTTCCTGGTGAAGGA  |
|                                                                                                    |                                                                                      | Reverse            | AGTTGCTATGGCAGAGGCAGAG   |
| <i>Basic-β-1,3-glucanase (GluB)</i> <sup>c</sup>                                                   | Ethylene (ET)                                                                        | Forward            | CCATCACAGGGTTCATTTAGG    |
|                                                                                                    |                                                                                      | Reverse            | CCATCCACTCTCTGACACAACCT  |
| <i>Abscisic acid-responsive (Le4)</i> <sup>c</sup>                                                 | Abscisic acid (ABA)                                                                  | Forward            | ACTCAAGGCATGGGTACTGG     |
|                                                                                                    |                                                                                      | Reverse            | CCTTCTTTCTCCTCCACCT      |
| <i>Jasmonic-responsive ETHYLENE RESPONSE FACTOR (ERF) transcription factor (JRE4)</i> <sup>d</sup> | coordinate transcription of metabolic genes in steroidal glycoalkaloids biosynthesis | Forward            | TGTTTCCTCCGGTGTTACGG     |
|                                                                                                    |                                                                                      | Reverse            | CGATTTTTTCGAAACTCTTTCC   |
| <i>GLYCOALKALOID METABOLISM 1 (GAME1)</i> <sup>d</sup>                                             | convert acetyl-coenzyme A (acetyl-CoA) to steroidal glycoalkaloids                   | Forward            | TTGCCGGATGTTCCATGATCG    |
|                                                                                                    |                                                                                      | Reverse            | CTAATGAAGAAACAGCGTCCTGG  |
| <i>SIEF X14449</i> (Housekeeping gene) <sup>c</sup>                                                | Elongation factor-1α                                                                 | Forward            | GATTGGTGGTATTGGAAGTGC    |
|                                                                                                    |                                                                                      | Reverse            | AGCTTCGTGGTGCATCTC       |

<sup>a</sup>Uppalapati *et al.* (2005); <sup>b</sup>Yan *et al.* (2013); <sup>c</sup>Martínez-Medina *et al.* (2013); <sup>d</sup>Abdelkareem *et al.* (2017)

**Table S2 Permutational Multiple Analysis of Variance (PERMANOVA) results based on Gower dissimilarities on phytohormone and  $\alpha$ -tomatine data for herbivory effects of *Meloidogyne incognita* root-knot nematodes (RKN) and the caterpillars of *Spodoptera exigua*.** Root samples were collected from tomato plants infected with *M. incognita* at different life cycle stages. At the same time, root materials were collected from control and *S. exigua* infested plants. The single and interactive effects of *M. incognita* and *S. exigua* feeding on jasmonic acid, salicylic acid, and abscisic acid were determined via a MANOVA model with *M. incognita* infection (Mi), *S. exigua* feeding (Se) and their interaction (Mi\*Se) as the explanatory variables.

| Plant traits                    | Source of variation | Df   | Sum Sq  | Mean Sq  | Pseudo-F | R <sup>2</sup> | P-value      |
|---------------------------------|---------------------|------|---------|----------|----------|----------------|--------------|
| JA, SA, ABA, $\alpha$ -tomatine | a). Invasion        |      |         |          |          |                |              |
|                                 | Mi                  | 1,16 | 0.04641 | 0.046407 | 1.52991  | 0.07675        | 0.235        |
|                                 | Se                  | 1,16 | 0.06159 | 0.061591 | 2.03046  | 0.10186        | 0.135        |
|                                 | Mi*Se               | 1,16 | 0.01133 | 0.011327 | 0.37341  | 0.01873        | 0.812        |
|                                 | b) Gallings         |      |         |          |          |                |              |
|                                 | Mi                  | 1,16 | 0.09426 | 0.094260 | 2.28677  | 0.11185        | 0.092        |
|                                 | Se                  | 1,16 | 0.08055 | 0.080552 | 1.95422  | 0.09559        | 0.140        |
|                                 | Mi*Se               | 1,16 | 0.00838 | 0.008379 | 0.20328  | 0.00994        | 0.881        |
|                                 | c) Reproduction     |      |         |          |          |                |              |
|                                 | Mi                  | 1,16 | 0.89807 | 0.89807  | 36.717   | 0.63148        | <b>0.001</b> |
|                                 | Se                  | 1,16 | 0.12972 | 0.12972  | 5.303    | 0.09121        | <b>0.027</b> |
|                                 | Mi*Se               | 1,16 | 0.00304 | 0.00304  | 0.124    | 0.00214        | 0.786        |

§ JA, jasmonic acid; SA, salicylic acid; ABA, abscisic acid; D.f., degree of freedom; Sum Sq; sum of squares; Mean Sq, mean of squares; Pseudo-F, F values by permutation; P, in boldface indicates statistical significance with  $p < 0.005$ ; P- values based on 999 permutations (lowest P-value possible 0.001)

**Table S3 Two-way factorial Analysis of Variance (ANOVA) results on phytohormone and  $\alpha$ -tomatine for the herbivory effects of *Meloidogyne incognita* root-knot nematode (RKN) and the caterpillars of *Spodoptera exigua*.** Root samples were collected from tomato plants infected with *M. incognita* at different life cycle stages. At the same time, root materials were collected from control and *S. exigua* infested plants. The impact of single and interactive effects of *M. incognita* and *S. exigua* feeding on jasmonic acid, salicylic acid, and abscisic acid were analyzed using linear models with *M. incognita* infection (Mi), *S. exigua* feeding (Se) and their interaction (Mi\*Se) as the explanatory variables.

| Hormone            | Source of variation | Invasion |        |        | Galling |        |               | Reproduction |         |                 |
|--------------------|---------------------|----------|--------|--------|---------|--------|---------------|--------------|---------|-----------------|
|                    |                     | Df       | F      | P      | Df      | F      | P             | Df           | F       | P               |
| JA                 | Mi                  | 1,16     | 2.4379 | 0.1380 | 1,16    | 7.2298 | <b>0.0161</b> | 1,16         | 9.8473  | <b>0.0064</b>   |
|                    | Se                  | 1,16     | 0.8640 | 0.3664 | 1,16    | 0.0101 | 0.9211        | 1,16         | 7.7380  | <b>0.0133</b>   |
|                    | Mi*Se               | 1,16     | 0.0843 | 0.7753 | 1,16    | 0.0208 | 0.8871        | 1,16         | 3.2416  | 0.0907          |
| SA                 | Mi                  | 1,16     | 0.0032 | 0.9557 | 1,16    | 0.3885 | 0.5419        | 1,16         | 24.3945 | <b>0.0001</b>   |
|                    | Se                  | 1,16     | 1.0879 | 0.3125 | 1,16    | 2.1073 | 0.1659        | 1,16         | 2.3594  | 0.1441          |
|                    | Mi*Se               | 1,16     | 0.2350 | 0.6344 | 1,16    | 1.5067 | 0.2374        | 1,16         | 0.7271  | 0.4064          |
| ABA                | Mi                  | 1,16     | 1.2494 | 0.2802 | 1,16    | 1.3632 | 0.2601        | 1,16         | 64.8805 | <b>5.07e-07</b> |
|                    | Se                  | 1,16     | 1.0846 | 0.3132 | 1,16    | 2.3191 | 0.1473        | 1,16         | 1.4077  | 0.2528          |
|                    | Mi*Se               | 1,16     | 1.1625 | 0.2969 | 1,16    | 0.0942 | 0.7629        | 1,16         | 0.3680  | 0.5526          |
| $\alpha$ -tomatine | Mi                  | 1,16     | 0.4026 | 0.5347 | 1,16    | 0.6014 | 0.4493        | 1,16         | 44.5357 | <b>5.35e-06</b> |
|                    | Se                  | 1,16     | 2.4654 | 0.1359 | 1,16    | 1.0287 | 0.3256        | 1,16         | 5.3249  | <b>0.0347</b>   |
|                    | Mi*Se               | 1,16     | 2.1021 | 0.1664 | 1,16    | 0.0058 | 0.9405        | 1,16         | 0.7079  | 0.4125          |

§ JA, jasmonic acid; SA, salicylic acid; ABA, abscisic acid; dpi, day post nematode inoculation; Df, degree of freedom; F, F test value; P, P-value, in boldface indicate significant different  $p \leq 0.05$

**Table S4 Permutational Multiple Analysis of Variance (PERMANOVA) results based on Gower dissimilarities on gene expression data for herbivory effects of *Meloidogyne incognita* root-knot nematode (RKN) and the caterpillars of *Spodoptera exigua*.** Root samples were collected from tomato plants infected with *M. incognita* at different life cycle stages. At the same time, root materials were collected from control and *S. exigua* infested plants. The single and interactive effects of *M. incognita* and *S. exigua* feeding on *Lipoxygenase D (LoxD)*; *Leucine aminopeptidase A (LapA)*; *Le4*, *abscisic acid-responsive Le4*; and *Basic-β-1-glucanase (GluB)*, *jasmonate-responsive Ethylene Response Factor 4 (JRE4)* and *glycoalkaloids metabolism 1 (GAME1)* were determined via a MANOVA model with *M. incognita* infection (Mi), *S. exigua* feeding (Se) and their interaction (Mi\*Se) as the explanatory variables

| Gene                                      | Source of variation | Df   | Sum Sq  | Mean Sq  | Pseudo-F | R <sup>2</sup> | P-value      |
|-------------------------------------------|---------------------|------|---------|----------|----------|----------------|--------------|
| <i>LoxD, LapA, Le4, GluB, JRE4, GAME1</i> | a). Invasion        |      |         |          |          |                |              |
|                                           | Mi                  | 1,16 | 0.02817 | 0.028169 | 0.80237  | 0.04007        | 0.556        |
|                                           | Se                  | 1,16 | 0.05063 | 0.050630 | 1.44218  | 0.07202        | 0.222        |
|                                           | Mi*Se               | 1,16 | 0.06247 | 0.062470 | 1.77942  | 0.08886        | 0.121        |
|                                           | b). Gallig          |      |         |          |          |                |              |
|                                           | Mi                  | 1,16 | 0.25410 | 0.254097 | 6.7827   | 0.25979        | <b>0.001</b> |
|                                           | Se                  | 1,16 | 0.06018 | 0.060178 | 1.6063   | 0.06153        | 0.211        |
|                                           | Mi*Se               | 1,16 | 0.06440 | 0.064401 | 1.7191   | 0.06584        | 0.178        |
|                                           | c). Reproduction    |      |         |          |          |                |              |
|                                           | Mi                  | 1,16 | 0.30856 | 0.308560 | 11.0240  | 0.28658        | <b>0.001</b> |
|                                           | Se                  | 1,16 | 0.27886 | 0.278864 | 9.9630   | 0.25900        | <b>0.001</b> |
|                                           | Mi*Se               | 1,16 | 0.04145 | 0.041447 | 1.4808   | 0.03849        | 0.225        |

§ *LoxD*, *Lipoxygenase D*; *LapA*, *Leucine aminopeptidase A*; *Le4*, *abscisic acid-responsive Le4*; *GluB*, *Basic-β-1-glucanase*; *JRE4*, *jasmonate-responsive Ethylene Response Factor 4*; *GAME1*, *glycoalkaloids metabolism 1*; D.f., degree of freedom; Sum Sq; sum of squares; Mean Sq, mean of squares; Pseudo-F, F values by permutation; P, in boldface indicates statistical significance with  $p < 0.005$ ; P- values based on 999 permutations (lowest P-value possible 0.001)

**Table S5 Two-way factorial Analysis of Variance (ANOVA) results on gene expression for the herbivory effect of *Meloidogyne incognita* root-knot nematode (RKN) and the caterpillars of *Spodoptera exigua*.** Root samples were collected from tomato plants infected with *M. incognita* at different life cycle stages. At the same time, root materials were collected from control and *S. exigua* infested plants. The impact of single and interactive effects of *M. incognita* and *S. exigua* feeding on *Lipoxygenase D (LoxD)*; *Leucine aminopeptidase A (LapA)*; *Le4*, *abscisic acid-responsive Le4*; and *Basic- $\beta$ -1-glucanase (GluB)*, *jasmonate-responsive Ethylene Response Factor 4 (JRE4)* and *glycoalkaloids metabolism 1 (GAME1)* were analyzed using linear model with *M. incognita* infection (Mi), *S. exigua* feeding (Se) and their interaction (Mi\*Se) as the explanatory variables.

| Gene         | Source of variation | Invasion |        |               | Galling |         |               | Reproduction |         |                 |
|--------------|---------------------|----------|--------|---------------|---------|---------|---------------|--------------|---------|-----------------|
|              |                     | Df       | F      | P             | Df      | F       | P             | Df           | F       | P               |
| <i>LoxD</i>  | Mi                  | 1,16     | 0.4725 | 0.5017        | 1,16    | 16.5670 | <b>0.0009</b> | 1,16         | 1.2412  | 0.2817          |
|              | Se                  | 1,16     | 2.7393 | 0.1174        | 1,16    | 2.4657  | 0.1359        | 1,16         | 8.3360  | <b>0.0107</b>   |
|              | Mi*Se               | 1,16     | 0.2754 | 0.6069        | 1,16    | 0.6747  | 0.4235        | 1,16         | 1.8034  | 0.1980          |
| <i>LapA</i>  | Mi                  | 1,16     | 2.4068 | 0.1404        | 1,16    | 0.0001  | 0.9933        | 1,16         | 0.0775  | 0.7843          |
|              | Se                  | 1,16     | 1.4937 | 0.2393        | 1,16    | 4.585   | <b>0.0477</b> | 1,16         | 14.6837 | <b>0.0015</b>   |
|              | Mi*Se               | 1,16     | 5.5807 | <b>0.0312</b> | 1,16    | 2.8774  | 0.1092        | 1,16         | 2.3975  | 0.1411          |
| <i>Le4</i>   | Mi                  | 1,16     | 2.7043 | 0.1196        | 1,16    | 2.3600  | 0.1440        | 1,16         | 3.4082  | 0.0835          |
|              | Se                  | 1,16     | 0.0823 | 0.7778        | 1,16    | 0.0100  | 0.9217        | 1,16         | 0.0159  | 0.9012          |
|              | Mi*Se               | 1,16     | 0.0584 | 0.8121        | 1,16    | 2.8430  | 0.1112        | 1,16         | 2.4099  | 0.1401          |
| <i>GluB</i>  | Mi                  | 1,16     | 1.2921 | 0.2724        | 1,16    | 0.9654  | 0.3404        | 1,16         | 1.5753  | 0.2275          |
|              | Se                  | 1,16     | 0.7648 | 0.3948        | 1,16    | 0.1532  | 0.7006        | 1,16         | 13.8329 | <b>0.0019</b>   |
|              | Mi*Se               | 1,16     | 0.8576 | 0.3682        | 1,16    | 0.6618  | 0.4279        | 1,16         | 2.1365  | 0.1632          |
| <i>JRE4</i>  | Mi                  | 1,16     | 0.2127 | 0.6509        | 1,16    | 15.8712 | <b>0.0011</b> | 1,16         | 30.2022 | <b>4.89e-05</b> |
|              | Se                  | 1,16     | 0.0139 | 0.9078        | 1,16    | 1.3143  | 0.2685        | 1,16         | 0.0177  | 0.8957          |
|              | Mi*Se               | 1,16     | 4.6575 | <b>0.0465</b> | 1,16    | 2.5703  | 0.1284        | 1,16         | 4.7645  | <b>0.0443</b>   |
| <i>GAME1</i> | Mi                  | 1,16     | 0.3679 | 0.5527        | 1,16    | 6.4438  | <b>0.0219</b> | 1,16         | 68.9237 | <b>3.42e-07</b> |
|              | Se                  | 1,16     | 4.2435 | 0.0561        | 1,16    | 2.7830  | 0.1147        | 1,16         | 15.1963 | <b>0.0013</b>   |
|              | Mi*Se               | 1,16     | 0.2399 | 0.6309        | 1,16    | 0.6425  | 0.4345        | 1,16         | 0.0708  | 0.7936          |

§ *LoxD*, *Lipoxygenase D*; *LapA*, *Leucine aminopeptidase A*; *Le4*, *abscisic acid-responsive Le4*; *GluB*, *Basic- $\beta$ -1-glucanase*; *JRE4*, *jasmonate-responsive Ethylene Response Factor 4*; *GAME1*, *glycoalkaloids metabolism 1*; dpi, days post nematode inoculation; Df, degree of freedom; F, F test value; P, P-value, in boldface indicate significant different  $p \leq 0.05$

## References

- Abdelkareem A, Thagun C, Nakayasu M, Mizutani M, Hashimoto T, Tsubasa Shoji. 2017.** Jasmonate-induced biosynthesis of steroidal glycoalkaloids depends on COI1 proteins in tomato. *Biochemical and Biophysical Research Communications* **489**: 206–210.
- Martínez-Medina A, Fernández I, Sánchez-Guzmán MJ, Jung SC, Pascual JA, Pozo MJ. 2013.** Deciphering the hormonal signalling network behind the systemic resistance induced by *Trichoderma harzianum* in tomato. *Frontiers in Plant Science* **4**: 1–12.
- Uppalapati SR, Ayoubi P, Weng H, et al. 2005.** The phytotoxin coronatine and methyl jasmonate impact multiple phytohormone pathways in tomato. *The Plant Journal* **42**: 201–217.
- Yan L, Zhai Q, Wei J, et al. 2013.** Role of tomato *lipoxygenase D* in wound-induced jasmonate biosynthesis and plant immunity to insect herbivores. *PLoS genetics* **9**: 1–16.
